# Supplementary material for: Genomic regions associated with stripe rust resistance against the Egyptian race revealed by genome-wide association study
Source: Springer Nature journal article supplement (doi:10.1186/s12870-020-02813-6), 2021-01-14
Supplement: MOESM1 [file 12870_2020_2813_MOESM1_ESM.pdf]

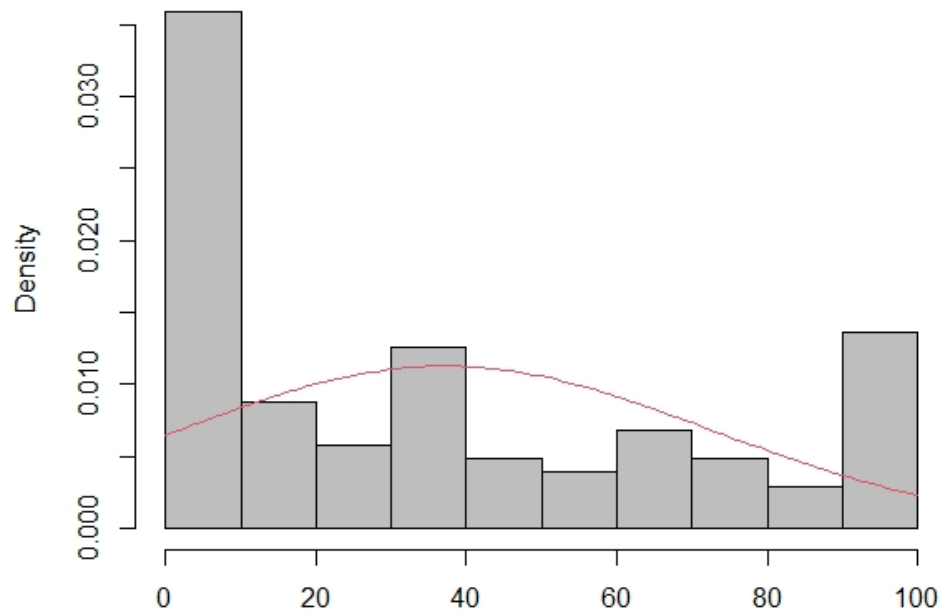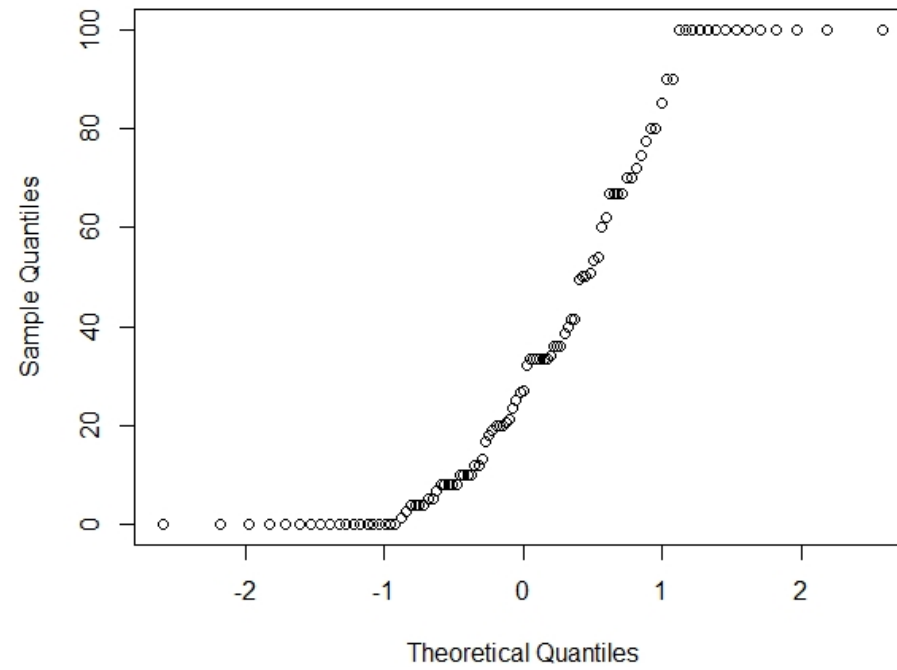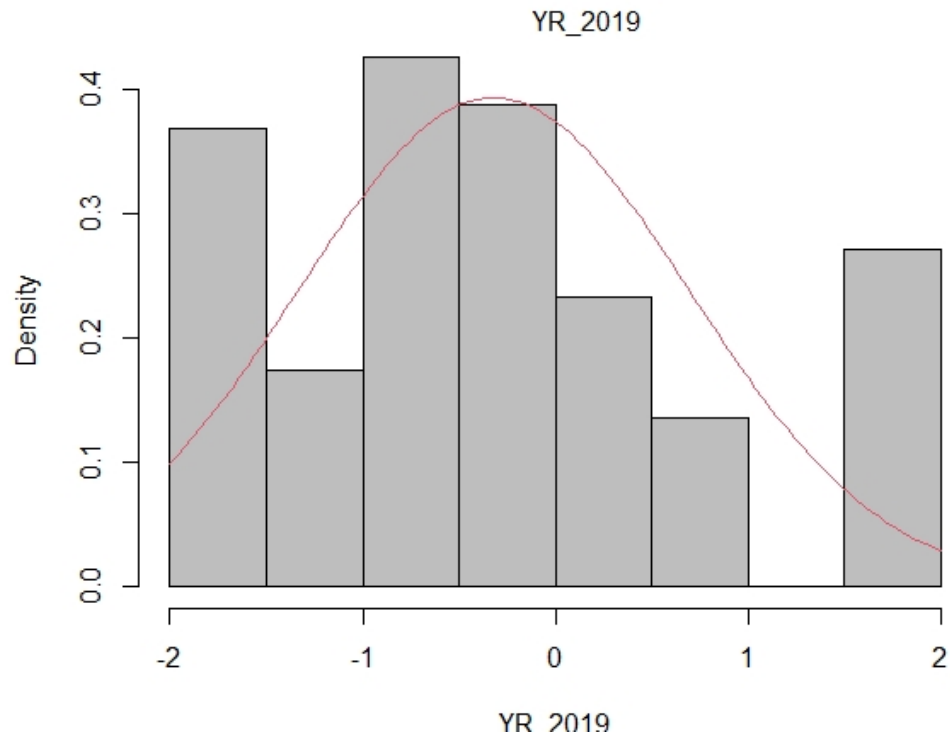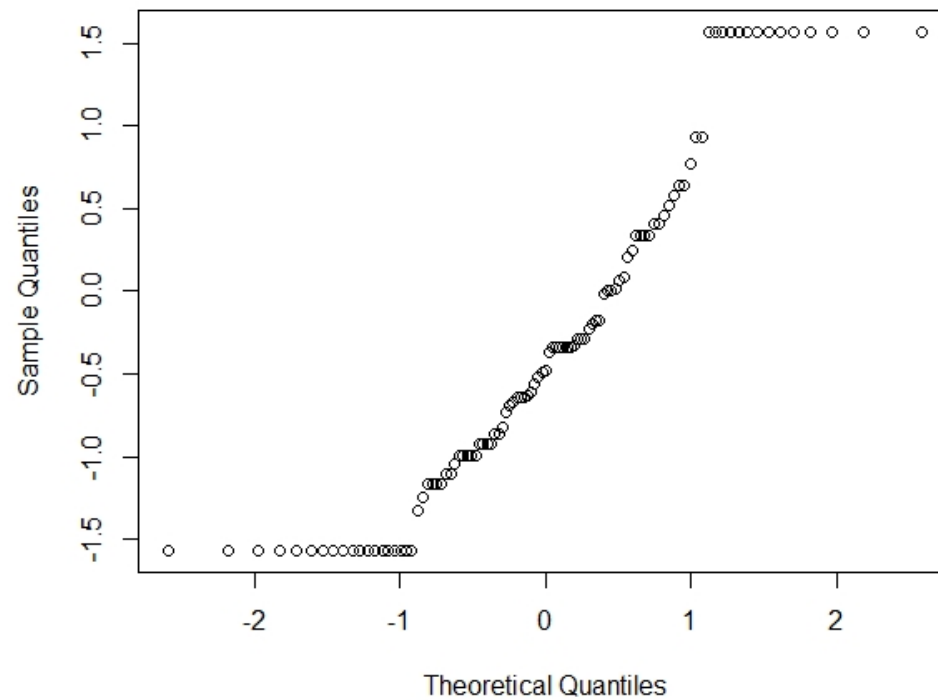

**Sup. Figure 1.**  
comparison  
between the  
untransformed  
(a. and b.) and  
transformed  
data (c. and d.)  
of stripe rust  
resistance for  
the 2019  
growing season
